1 **Coronary Artery anomalies in Patients Undergoing transcatheter**  
2 **aortic valve REplacement.**

3 **The CAPTURE registry**

4  
5 Omar A. Oliva<sup>1</sup>, MD; Lorenzo Scalia<sup>1</sup>, MD; Antonio Sisinni<sup>1</sup>, MD; Enrico Poletti<sup>1</sup>, MD; Jessica  
6 Zannoni<sup>1</sup>, MD; Mattia Mazzucca<sup>1</sup>, MD; Enrico Criscione<sup>1</sup>, MD; Antonio Popolo Rubbio<sup>1</sup>, MD;  
7 Riccardo Gorla<sup>1</sup>, MD, PhD; Mauro Agnifili<sup>1</sup>, MD; Francesco Bedogni<sup>1</sup>, MD; Luca Testa<sup>1</sup>, MD, PhD.

8  
9 <sup>1</sup>Department of Clinical and Interventional Cardiology, IRCCS Policlinico San Donato, 20097 San  
10 Donato Milanese (MI), Italy

11 *Address for correspondence:*

12 Luca Testa, MD, PhD

13 Department of Clinical and Interventional Cardiology, IRCCS Policlinico San Donato

14 Piazza Edmondo Malan 2, 20097 San Donato Milanese (Milano), Italy.

15 Email: [luctes@gmail.com](mailto:luctes@gmail.com)

16

17  
18 Text word count: 5000

19

20 **Short title:** The CAPTURE registry

21 **Abstract**

22 **Background:** The incidence and possible implications of coronary artery anomalies (CAA) in  
23 patients undergoing transcatheter aortic valve replacement (TAVR) are uncertain.

24 **Aims:** To evaluate the impact of CAA on TAVR outcomes, and to suggest possible strategies to  
25 prevent CAA related complications.

26 **Methods:** Among 2,164 consecutive patients who underwent TAVR in our center, 15 (0.69%) were  
27 identified to have a CAA, based on pre-operative Computed Tomography (CT) scans.

28 **Results:** CT-angiography revealed the following features of CAA: the majority of anomalous CAA  
29 concerned the right coronary artery (80%), followed by the left main (13.3%) and the left  
30 circumflex (6.7%). An intramural course was observed only in 26.7% patients, whereas an acute  
31 take-off was detected in more than half of the study cohort (53.3%). High-risk sudden cardiac death  
32 features were observed in 6 (40%) patients.

33 Technical success was 86.7%, device success was 80%. One patient experienced a cardiac arrest 15  
34 minutes after procedure, resulting from occlusion of the anomalous right coronary artery with the  
35 ostium located at the right-to-non coronary commissure. There were no cases of  $\geq$  moderate  
36 paravalvular leak or stroke. One non-cardiac related death was recorded 4 months after the  
37 procedure.

38 **Conclusions:** The interaction between transcatheter bioprosthesis and different CAA types could  
39 lead to ominous sequelae, if not promptly recognized and treated accordingly.

40

41 **Keywords**

42 Coronary artery anomalies; TAVI; bioprosthesis; aortic valve replacement; aortic stenosis.

43

44 **Abbreviations list**

45 BEV, balloon-expandable valve; CAA, coronary artery anomalies; CT, Computed Tomography;  
46 LAD, left anterior descending; LCx, left circumflex artery; LSV, left sinus of Valsalva; PVL,  
47 paravalvular leak; RCA, right coronary artery; RSV, right sinus of Valsalva; SAVR, surgical aortic  
48 valve replacement; STJ, sino-tubular junction; TAVR, transcatheter aortic valve replacement; TTE,  
49 transthoracic echocardiography; VARC-3, Valve Academic Research Consortium-3; SEV, self-  
50 expanding valve.

## 51 **Introduction**

52 Coronary artery anomalies (CAA) are rare findings, often incidentally encountered. The most  
53 common phenotype is an anomalous origin from the aorta,<sup>1</sup> occurring in approximately 0.8% of  
54 patients undergoing coronary artery angiography. However, if we exclude cases where the left  
55 anterior descending (LAD) and left circumflex artery (LCx) have separated origins from the left  
56 sinus of Valsalva (LSV), the incidence drops to 0.2%.<sup>2</sup> The assessment of the risk of sudden cardiac  
57 death and subsequent treatment is still a matter of debate due to limited data availability.<sup>3</sup>  
58 Nevertheless, there are few anomalies that could be injured during surgical aortic valve replacement  
59 (SAVR), mainly LCx from right sinus of Valsalva (RSV) with a retro-aortic course.<sup>4,5</sup>

60 In this variant, the peri-procedural is determined by the prosthesis compression or suture  
61 ligation.<sup>6</sup> Surgeons have implemented different precautions to ensure the safety of surgical  
62 treatment, including the following: i) undersizing of the aortic valve bioprosthesis;<sup>5,7,8</sup> ii) dissection  
63 of the LCx from the aortic annulus;<sup>8-10</sup> iii) tilting of the bioprosthesis;<sup>11</sup> sutureless bioprosthesis,  
64 thanks to ligation risk absence and to inferior impact on the aortic annulus;<sup>12</sup> iv) supranular or  
65 stentless bioprosthesis implantation<sup>5</sup> and/or v) revascularization only in case of overt ischemia,  
66 through coronary artery bypass grafting<sup>4,13</sup> or drug eluting stent implantation.<sup>6,13</sup>

67 Other anomalies can be treated with transection and re-implantation (e.g. RCA from LSV with  
68 retro-aortic course)<sup>14</sup> or with remodelling of the adjacent structure (e.g. pulmonary trunk and right  
69 ventricle) to avoid compression (e.g. RCA from LSV with an inter-arterial course).<sup>15</sup>

70 Transcatheter aortic valve replacement (TAVR) has been established as an effective treatment  
71 for patients with severe aortic stenosis<sup>16</sup>. Since the number of TAVR cases is meant to grow with  
72 the expansion of the indication to younger and lower risk patients, the likelihood of performing  
73 TAVR in the presence of a CAA should consistently increase.

74 The aim of the study is to evaluate the incidence and clinical implications of CAAs in patients  
75 undergoing TAVR, and to propose possible management algorithms.

## 76 **Methods**

77 *Study design and data collection*

78 This observational retrospective single-center study analyzed all consecutive patients with  
79 evidence of CAA who underwent TAVR procedure from July 2015 to March 2023 at our Center.

80 Inclusion criteria were: 1- detection of CAA at pre-TAVR computed tomography (CT) scan; 2-  
81 patient with severe aortic stenosis of a native valve or degenerated bioprosthesis with an indication  
82 for transcatheter treatment. Exclusion criteria was previous cardiac surgery for CAA re-  
83 implantation.

84 Data regarding baseline clinical and echocardiographic characteristics, CT scan, procedural  
85 features, as well as follow-up at 30 day and 1 year, were collected into our electronic prospective  
86 institutional database.

87 Patients were deemed suitable for TAVR after Heart Team evaluation, and they all provided written  
88 informed consent for the procedure.

89 The study complied with the Declaration of Helsinki. The local ethics committees approved the use  
90 of retrospective anonymized data for this study.

91

92 *CT scan and transthoracic echocardiography*

93 CT-angiography scans were performed on 64- or 128-row electrocardiography gated multidetector  
94 scanner (Somatom Definition; Siemens healthcare, Forchheim, Germany). The 3-Mensio valves  
95 software (version 8.2, Pie Medical Imaging, Maastricht, The Netherlands) enabled multiplanar  
96 reconstruction analysis of the aortic root and of the coronary arteries, evaluating both the diastolic  
97 and systolic phases.<sup>17</sup> The following features of coronary arteries were evaluated: i) take-off level,  
98 below or above aortic valve commissure; ii) take-off angle, acute ( $<45^\circ$ ) or non-acute ( $\geq 45^\circ$ ); iii)  
99 course, pre-pulmonic, inter-arterial, sub-pulmonic, retro-aortic or retro-cardiac; iv) ostia type,  
100 separate, shared or branch vessel; v) proximal tract morphology, normal, oval or slit-like and vi)  
101 evidence of intramural location, as suggested by Cheezum et al.<sup>18</sup>, allowing to plan a strategy to  
102 avoid negative interaction with TAVR devices. Measurements were made by a dedicated laboratory

103 of radiology technicians.

104 Oversizing was determined as: calculated perimeter oversizing (%) = [(prosthesis perimeter/CT  
105 valve perimeter -1) \*100].

106 Transthoracic echocardiography (TTE) was performed pre- and post-procedural, the latter  
107 repeated at discharge. Post-procedural paravalvular leak (PVL) was arranged evaluated by  
108 experienced echocardiographers, according to Valve Academic Research Consortium-3 (VARC-3)  
109 criteria.<sup>19</sup>

110

### 111 *TAVR procedure*

112 Transfemoral TAVR was performed under local anesthesia. Conscious sedation was added  
113 according to patient's tolerance. The type of bioprosthesis was selected by the first operator based  
114 on the CT scan images.

115

### 116 *Study end-points*

117 Technical success was defined in accordance with VARC-3 criteria as: i) freedom from  
118 mortality; ii) successful access, delivery of the device, and retrieval of the delivery system; iii)  
119 correct positioning of a single prosthetic heart valve into the proper anatomical location and iv)  
120 freedom from surgery or intervention related to the device (permanent pacemaker implantation  
121 excluded), or to a major vascular or access-related, or cardiac structural complication.

122 Device success at 30 days was referred to the attainment of technical success and the  
123 fulfillment of the following situations: i) freedom from mortality; ii) freedom from surgery or  
124 intervention related to device (permanent pacemaker implantation excluded), major vascular,  
125 access-related or cardiac structural complication; and iii) intended performance of the valve, as  
126 mean gradient <20 mmHg, peak velocity <3 m/s, Doppler velocity index  $\geq 0.25$ , and less than  
127 moderate aortic regurgitation.<sup>19</sup>

128

129 *Statistical analysis*

130 Categorical and dichotomous variables are displayed as frequencies and percentages,  
131 meanwhile, continuous variables are reported as mean and standard deviation, or median and  
132 interquartile range, as appropriate.

133 Analyses were performed using SPSS statistical analysis software version 28.0 (IBM  
134 Corporation, Armonk, NY, USA).

135 **Results**

136 *Baseline characteristics*

137 Among the last 2,164 patients treated by means of TAVR, only 15 (0.69%) were identified to  
138 have a CAA on pre-operative CT scan.

139 The mean age was  $83.7 \pm 7.9$  years, and the majority were female (80.0%). Mean STS score  
140 was  $4.0 \pm 2.8$ . One patient (ID 10) had prior SAVR with a Trifecta 23 bioprosthesis, meanwhile 2  
141 patients (20%) suffered of coronary artery disease. Of those, one (ID 2) had previous coronary  
142 artery bypass surgery with evidence of occlusion of the saphenous graft for the anomalous RCA,  
143 whereas the other one (ID 7) suffered from a chronic total occlusion of the anomalous RCA due to  
144 intrastent restenosis in the middle and proximal tract.

145 CT-angiography identified CAA features: most anomalies affected RCA (80%), with LM  
146 (13.3%) and LCx (6.7%) to follow. Intramural course was observed only in 4 patients (26.7%),  
147 meanwhile, acute take-off was detected in more than half (53.3%) of the study cohort. Ostia with  
148 high-risk sudden cardiac death features (oval or slit like) were observed in 6 patients (40%), as  
149 shown in *Table 1 and Suppl Table 1*.

150

151 *Procedural data and outcomes*

152 All the procedures were performed through trans-femoral approach and in 3 cases the  
153 procedure was performed with an embolic cerebral protection system. Rate of predilatation was  
154 66.7%, meanwhile postdilatation was performed only in 20% of patients. Three patients received a

155 balloon expandable valve (BEV). Only one (ID 2) patient required femoral artery stenting due to  
156 main access vascular complication (*Table 2 and Suppl Table 2*).

157 Minimal oversizing was achieved, with an overall median oversizing of 11% [5%-17%].

158 One patient (ID 11) experienced cardiac arrest 15 minutes after the end the procedure, due to  
159 anomalous RCA occlusion (height 14 mm). The phenotype was a CAA originating from a  
160 commissure and necessitated bailout emergency coronary artery stenting with Impella (®Abiomed)  
161 mechanical ventricular assist device. Of note, the CT scan finding was underestimated due to lack  
162 of data: a high frame valve was implanted without coronary protection and with 5 mm implantation  
163 depth, postdilatation was performed and no final selective CAA angiography was conducted.

164 *Table 3* shows which valve and size has been used for each CAA phenotype.

165 Technical success was (86.7%), due to a cardiac arrest and a main access vascular  
166 complication, whereas device success at 30 days was lower (80%), due to the two cases of technical  
167 unsuccess and one case of aortic valve mean gradient >20 mmHg. There was no evidence of ≥  
168 moderate PVL and of cerebral strokes. One patient deceased 4 months after the procedure, due to  
169 non-cardiac related causes (*Table 2*).

170

## 171 **Discussion**

172 CAAs are rare but increasingly recognized by cardiac imaging, and a wide spectrum of alteration  
173 can be observed.<sup>20</sup> The phenotypes observed in elderly patients undergoing TAVR are usually  
174 benign, even if CAAs show high-risk features.<sup>21</sup>

175 The main findings of this study can be summarized as follows:

- 176 1) the incidence of a CAA in patients undergoing TAVR is rare, below 1% of the cases;
- 177 2) myocardial infarction represents a major concern in patients with CAA undergoing TAVR as  
178 having an incidence of 6.7%: a meticulous risk assessment using CT scan is imperative.

179 To the best of our knowledge, this is the largest cohort of patients with a CAA undergoing TAVR,  
180 and a number of technical considerations can be done based on the cases performed; as such, we



181 hereby propose a classification, based on phenotypes of CAA, and two algorithms aimed at  
182 preventing possible CAA related complications.

183 The first group is composed by patients deemed “at risk of ab extrinseco CAA compression”, due to  
184 valve implantation (*Central Illustration A*). In this subset of patients, occlusion of coronary arteries  
185 with a retroaortic course is the most common complication described in literature, due to the strict  
186 anatomical relationship between the CAA and the aortic root, where the radial forces generated by  
187 the bioprosthesis are exerted<sup>22–25</sup> An interarterial course is more common and theoretically  
188 associated with a lower risk of compression due to the shorter vessel segment at risk (to be  
189 evaluated case by case)<sup>26–28</sup>. The intramural course can be combined with the previous ones and it is  
190 the least described in literature,<sup>29</sup> probably due to the low impact on coronary artery perfusion in  
191 patients who did not show sudden cardiac death in a lifelong.

192 There are a few strategies described in literature to avoid CAA compression:

193 1) to assess the effective risk with an aortogram taken during balloon predilatation.<sup>24,26,27</sup>

194 As a matter of fact, this procedure is not performed as a routine practice, but it is reserved only for  
195 patients exhibiting high-risk features (e.g. retro-aortic course). Additionally, predilatation with  
196 selective CAA angiography is feasible;<sup>23</sup> however it is technically more demanding and entails the  
197 risk of proximal vessel injury.

198 2) the use of self-expandable valves (SEV) which have the capability to be recaptured, thus  
199 allowing for valve removal in cases of relevant overt compression.<sup>24,29,30</sup> In our study, recapturable  
200 devices were used in 9 out of 15 patients: low radial force SEV,<sup>31</sup> such as the Portico<sup>32</sup> and Acurate  
201 Neo, have the advantage of exerting lesser impact on the aortic root with minimal deformation.

202 In our series, low radial force SEV were utilized in 6/15 patients.

203 3) the use of BEV that, unlike SEV, do not keep generating forces on the aortic root after  
204 deployment.<sup>27</sup> BEV was used in 3 out of 15 patients.

205 4) Bioprosthesis undersizing allows lower stress and aortic anulus deformation. Oversizing in high-  
206 risk features is always not recommended,<sup>22</sup>

207 5) coronary protection with the chimney technique, especially when there is evidence of CAA  
208 obstruction during balloon valvuloplasty, in order to quickly deal with the abrupt coronary  
209 occlusion.<sup>33</sup> In our series it was performed in 2/15 patients.

210

211 The second group is composed by patients deemed “at risk of CAA ostium occlusion” (*Central*  
212 *Illustration B*). Historically, CAA originating from the commissure between two cusps have not  
213 been considered at risk for coronary occlusion: this is true when the aortic root is large enough to  
214 accommodate the bioprosthesis and still there is enough space between the latter and the coronary  
215 ostium. This measure is typically evaluated while planning a VIV procedure, i.e. the “VTC: valve-  
216 to-coronary”. Of note, there is no standard reference to consider in case of a CAA<sup>33,34</sup>

217 In our sample, 1 patient over 4 experienced an acute CAA occlusion.

218 Consequently, we propose the following strategies:

219 1) mild “intentional” misalignment, to avoid placing a strut in front of the CAA ostia.<sup>33</sup> In our series  
220 the only valve that could be deliberately misaligned were the Acurate Neo and Evolut. However,  
221 being a retrospective study, it was not systematically used.

222 2) Low frame valve deployment (BE might be appropriate), to lessen the interaction of the upper  
223 crown with leaflets and CAA ostium (1/4 patients).

224 3) A slightly deeper implantation, to reduce leaflets eversion although it may increase the risk of  
225 conduction disturbances.<sup>35</sup>

226 4) Coronary protection thorough the chimney technique, as described previously. We suggest  
227 performing this technique in anatomies with highest risk of occlusion.

228 Additional general strategies for these two groups are: i) avoidance of postdilatation, if feasible  
229 (20% patients in our sample), in order to avoid further stress on the aortic root and eventual  
230 compression and ii) final selective CAA angiography<sup>31,34</sup> to verify patency of the CAA (3/15 in our  
231 sample).

232

233 The final group consists of patients at “high risk of impaired CAA re-access”. This group  
234 encompasses (a) CAA located above the sino-tubular junction (STJ), as well as (b) CAA originating  
235 from the commissure and (c) from the opposite sinus of Valsalva (*Central Illustration C*) where the  
236 distance is enough to make an abrupt occlusion of the coronary artery unlikely but still the  
237 cannulation might be cumbersome. For the latter two types, the suggested strategies for preventing  
238 CAA ostium occlusion remain the same. However, there are two main strategies that we suggest to  
239 preserve coronary re-access in a CAA above the STJ:

- 240 1) use of a valve with a lower height than the origin of the CAA (ID 9: in this case it was not  
241 applied due to the patient’s age of 90 years old and no coronary artery disease), and
- 242 2) use of an open frame valve, as the Acurate Neo (ID 6). Both strategies are intended to avoid the  
243 interference of the upper crown with catheters.

244

245 To systematically evaluate and manage the possible consequences of the presence of a CAA during  
246 TAVR, we hereby present two algorithms.

247 The first algorithm is based on the mechanism of CAA flow impairment, and it is described in  
248 *Figure 1*. Firstly, if the patient belongs to group 1 (risk of ab extrinseco compression), balloon  
249 predilatation with concomitant angiography should be performed. The subsequent strategy depends  
250 on the presence of compression. If the patient is in group 2 (risk of coronary ostium occlusion), the  
251 strategies will be different according to the type of CAA (commissural origin vs. low origin from  
252 opposite sinus of Valsalva). General strategies for both groups are avoidance of postdilatation and  
253 final selective CAA angiography.

254 The second algorithm is based on the risk of impaired coronary re-access (group 3), as shown  
255 in *Figure 2*. Strategies are different based on the phenotype: origin above the STJ, commissural  
256 origin and low origin from opposite sinus of Valsalva.

257

258 **Study limitations**

259 Data analysis has been conducted retrospectively and the small number of patients did not  
260 allow more extensive data investigation.

261 Due to CAA rarity and their heterogeneity, the results of the analysis still must be considered  
262 exploratory; further studies applying the proposed algorithms are needed for a thorough validation.

263

264

## 265 **Conclusions**

266 The presence of a CAA may significantly increase the risk of threatening complications during  
267 TAVR. The possible interaction between the transcatheter bioprosthesis and the different CAA types  
268 should be comprehensively evaluated upfront and the procedure planned accordingly.

269

## 270 **Acknowledgements**

271 None

## 272 **Sources of funding**

273 This work was supported by IRCCS Policlinico San Donato, a clinical research hospital partially  
274 funded by the Italian Ministry of Health.

## 275 **Disclosures**

276 Francesco Bedogni is consultant for Medtronic, Abbott, and Boston Scientific; Luca Testa is  
277 consultant for Abbott, Meril, Medtronic and Boston Scientific. The other authors declare no conflict  
278 of interest.

279 **References**

- 280 1. Gentile F, Castiglione V, De Caterina R. Coronary Artery Anomalies. *Circulation*. 2021;144(12):983–996.
- 281 2. Yildiz A, Okcun B, Peker T, Arslan C, Olcay A, Bulent Vatan M. Prevalence of coronary artery anomalies  
282 in 12,457 adult patients who underwent coronary angiography. *Clinical cardiology*. 2010;33(12).
- 283 3. Baumgartner H, de Backer J, Babu-Narayan S V., Budts W, Chessa M, Diller GP, Iung B, Kluin J, Lang  
284 IM, Meijboom F, Moons P, Mulder BJM, Oechslin E, Roos-Hesselink JW, Schwerzmann M, et al. 2020 ESC  
285 Guidelines for the management of adult congenital heart disease. *European heart journal*. 2021;42(6):563–645.
- 286 4. Vaishnava P, Pyo R, Filsoufi F, Sharma S. Compression of an anomalous left circumflex artery after aortic  
287 and mitral valve replacement. *The Annals of thoracic surgery*. 2011;92(5):1887–1889.
- 288 5. Pellicano M, Toth G, Di Gioia G, Rusinaru D, Wijns W, Barbato E, De Bruyne B, Degrieck I, Van  
289 Mieghem C. Unrecognized anomalous left circumflex coronary artery arising from right sinus of Valsalva: a  
290 source of perioperative complication. *Journal of cardiovascular medicine (Hagerstown, Md.)*. 2016;17 Suppl  
291 2:e228–e230.
- 292 6. López Castillo M, Martín Reyes R, Palfy J, Franco JA, Piñero A, Navarro F, Tomás M, Aldámiz G, Farré  
293 J. Successful Treatment of Compression of an Anomalous Circumflex Artery After Aortic Valve Replacement  
294 With Percutaneous Coronary Intervention. *JACC. Cardiovascular interventions*. 2016;9(15):1629–1630.
- 295 7. Yokoyama S, Takagi K, Mori R, Aoyagi S. Aortic valve replacement in patients with an anomalous left  
296 circumflex artery: technical considerations. *Journal of cardiac surgery*. 2012;27(2):174–177.
- 297 8. Castillo JG, Sanz J, Fischer GW, Bowman K, Filsoufi F. Management of anomalous left circumflex artery  
298 encircling the aortic annulus in a patient undergoing multivalvular surgery. *Journal of cardiac surgery*.  
299 2009;24(6):667–669.
- 300 9. Flores RM, Byrne JG. Aortic valve replacement with an anomalous left circumflex coronary artery  
301 encircling the aortic anulus. *The Journal of thoracic and cardiovascular surgery*. 2001;121(2):396–397.
- 302 10. Liebrich M, Tzanavaros I, Scheid M, Voth W, Doll KN, Hemmer WB. Aortic valve/root  
303 procedures in patients with an anomalous left circumflex coronary artery and a bicuspid aortic valve: anatomical  
304 and technical implications. *Interactive cardiovascular and thoracic surgery*. 2015;21(1):114–116.
- 305 11. Umakanthan R, Brewer ZE, Byrne JG, Ahmad RM. Use of the hybrid operating room for aortic  
306 valve replacement in a patient with anomalous left circumflex artery. *The Journal of thoracic and cardiovascular  
307 surgery*. 2010;139(6).

- 308 12. Harky A, Hof A, Ahmad MU, Uppal R. Incidental finding of anomalous circumflex coronary  
309 artery from right coronary sinus prior to aortic valve surgery. *BMJ case reports*. 2017;2017.
- 310 13. Alameddine AK, Binnall BJ, Conlin FT, Broderick PJ. Aortic Valve Replacement in 8 Adults  
311 with Anomalous Aortic Origin of Coronary Artery. *Texas Heart Institute journal*. 2019;46(3):189–194.
- 312 14. Inan K, Ucak A, Onan B, Tamtekin B, Temizkan V, Yilmaz AT. Posterior root enlargement for  
313 aortic valve replacement associated with unexpected anomalous right coronary artery. *Journal of cardiac surgery*.  
314 2010;25(1):92–95.
- 315 15. Roughneen PT, Al-Dossari GA. The Anomalous Coronary Artery in Aortic Valve Replacement: A  
316 Case For Caution. *The Annals of thoracic surgery*. 2016;102(2):e113–e115.
- 317 16. Vahanian A, Beyersdorf F, Praz F, Milojevic M, Baldus S, Bauersachs J, Capodanno D, Conradi  
318 L, De Bonis M, De Paulis R, Delgado V, Freemantle N, Gilard M, Haugaa KH, Jeppsson A, et al. 2021  
319 ESC/EACTS Guidelines for the management of valvular heart disease. *European heart journal*. 2022;43(7):561–  
320 632.
- 321 17. Jilaihawi H, Kashif M, Fontana G, Furugen A, Shiota T, Friede G, Makhija R, Doctor N, Leon  
322 MB, Makkar RR. Cross-sectional computed tomographic assessment improves accuracy of aortic annular sizing  
323 for transcatheter aortic valve replacement and reduces the incidence of paravalvular aortic regurgitation. *Journal*  
324 *of the American College of Cardiology*. 2012;59(14):1275–1286.
- 325 18. Cheezum MK, Liberthson RR, Shah NR, Villines TC, O’Gara PT, Landzberg MJ, Blankstein R.  
326 Anomalous Aortic Origin of a Coronary Artery From the Inappropriate Sinus of Valsalva. *Journal of the American*  
327 *College of Cardiology*. 2017;69(12):1592–1608.
- 328 19. Généreux P, Piazza N, Alu MC, Nazif T, Hahn RT, Pibarot P, Bax JJ, Leipsic JA, Blanke P,  
329 Blackstone EH, Finn MT, Kapadia S, Linke A, Mack MJ, Makkar R, et al. Valve Academic Research Consortium  
330 3: Updated Endpoint Definitions for Aortic Valve Clinical Research. *Journal of the American College of*  
331 *Cardiology*. 2021;77(21):2717–2746.
- 332 20. Villa AD, Sammut E, Nair A, Rajani R, Bonamini R, Chiribiri A. Coronary artery anomalies  
333 overview: The normal and the abnormal. *World journal of radiology*. 2016;8(6):537.
- 334 21. Gräni C, Benz DC, Steffen DA, Clerc OF, Schmied C, Possner M, Vontobel J, Mikulicic F,  
335 Gebhard C, Pazhenkottil AP, Gaemperli O, Hurwitz S, Kaufmann PA, Buechel RR. Outcome in middle-aged  
336 individuals with anomalous origin of the coronary artery from the opposite sinus: a matched cohort study.  
337 *European heart journal*. 2017;38(25):2009–2016.

- 338           22.           Acosta-Vélez JG, Del Blanco BG, Guindo J, Serrano JM, Calabria HC, Aguasca GM, Gonzalez-  
339 Alujas T, Durán I, Tornos P. Acute artery occlusion during transcatheter aortic valve replacement in a patient with  
340 an anomalous origin of the circumflex artery. *JACC. Cardiovascular interventions*. 2014;7(11):1324–1325.
- 341           23.           Tabachnick D, Obokhae B, Harrington K, Brown DL. Assessing the risk of an anomalous  
342 circumflex artery using balloon aortic valvuloplasty prior to transcatheter aortic valve replacement.  
343 *Catheterization and cardiovascular interventions : official journal of the Society for Cardiac Angiography &*  
344 *Interventions*. 2020;96(2):497–499.
- 345           24.           Mennuni MG, Pagnotta P, Presbitero P. Percutaneous aortic valve implantation in severe stenosis  
346 associated with anomalous origin of the circumflex coronary artery. *European heart journal*. 2011;32(13):1687.
- 347           25.           Mizote I, Conradi L, Schäfer U. A case of anomalous left coronary artery obstruction caused by  
348 lotus valve implantation. *Catheterization and cardiovascular interventions : official journal of the Society for*  
349 *Cardiac Angiography & Interventions*. 2017;90(7):1227–1231.
- 350           26.           Giri J, Szeto WY, Bavaria J, Herrmann HC. Transcatheter aortic valve replacement with coronary  
351 artery protection performed in a patient with an anomalous left main coronary artery. *Journal of the American*  
352 *College of Cardiology*. 2012;60(6).
- 353           27.           Weich H, Ackermann C, Viljoen H, Van Wyk J, Mabin T, Doubell AF. Transcatheter aortic valve  
354 replacement in a patient with an anomalous origin of the right coronary artery. *Catheterization and cardiovascular*  
355 *interventions : official journal of the Society for Cardiac Angiography & Interventions*. 2011;78(7):1013–1016.
- 356           28.           Birkl K, Plank F, Bonaros N, Feuchtner G, Friedrich G. Transcatheter Aortic Valve Repair in a  
357 Patient With Anomalous Right Coronary Artery Originating From the Left Aortic Sinus and Myelodysplastic  
358 Syndrome. *Cureus*. 2020;12(7).
- 359           29.           Marcus GU, Orbach A, Fremes S, Vijayaraghavan R, Kerner A, Oikonomou A, Roifman I,  
360 Wijeysondera HC. TAVR in a Patient With Anomalous Origin and Course of the Left Main Coronary Artery.  
361 *JACC. Case reports*. 2022;4(22):1467–1471.
- 362           30.           Cho SW, Kim BG, Park TK, Choi SH, Gwon HC, Park SJ, Nah JC. Transcatheter aortic valve  
363 replacement in a patient with anomalous origin of the left coronary artery. *Journal of cardiology cases*.  
364 2019;19(4):133–135.
- 365           31.           Tzanis G, Ancona M, Romano V, Bellini B, Sgura F, Montorfano M. TAVR in a patient with an  
366 anomalous left main: Self-expanding prosthesis might be the preferred choice. *Hellenic journal of cardiology :*  
367 *HJC = Hellenike kardiologike epitheorese*. 2020;61(5):344–345.

- 368           32.           Gorla R, Oliva OA, Poletti E, Finotello A, Morganti S, Zannoni J, Agnifili M, Barletta M,  
369 Squillace M, Criscione E, Tusa M, Brambilla N, Auricchio F, Testa L, Bedogni F. Impact of Nodular  
370 Calcifications in the Aortic Annulus and Left Ventricular Outflow Tract on TAVI Outcome with New-Generation  
371 Devices. *Reviews in Cardiovascular Medicine*. 2022;23(11).
- 372           33.           Costa G, Sgroi C, Strazzieri O, Reddavid C, Valvo R, Motta S, Frittitta V, Dipietro E, Tamburino  
373 C, Barbanti M. Intentional Misalignment of a Transcatheter Aortic Valve to Preserve Reaccess to Coronaries of  
374 Anomalous Origin. *JACC. Case reports*. 2022;4(2):83–86.
- 375           34.           Geyer M, Tamm AR, Da Rocha E Silva JG, Gori T, Münzel T, Von Bardeleben RS. Beware of the  
376 commissure - transcatheter aortic valve replacement in a rare anomaly of the left main coronary. *Journal of*  
377 *cardiovascular medicine (Hagerstown, Md.)*. 2022;23(7):477–478.
- 378           35.           Casenghi M, Oliva OA, Squillace M, Bellamoli M, Poletti E, Popolo Rubbio A, Testa L, Bedogni  
379 F, De Marco F. Bailout From Sinus Jailing: In-Series TAVR-in-TAVR to Avoid Coronary Flow Obstruction.  
380 *JACC. Case reports*. 2021;3(4):678–681.
- 381
- 382



383 **Table 1. Baseline characteristics of patients with CAA who underwent TAVR.**

| Variables                       |                                                    | Overall<br>(N=15)   |
|---------------------------------|----------------------------------------------------|---------------------|
| Clinical characteristics        | Age (years)                                        | 83.7 ± 7.9          |
|                                 | Female sex                                         | 12 (80.0%)          |
|                                 | Hypertension                                       | 10 (66.7%)          |
|                                 | Diabetes                                           | 2 (13.3%)           |
|                                 | Dyslipidemia                                       | 8 (53.3%)           |
|                                 | COPD                                               | 3 (6.7%)            |
|                                 | Coronary artery disease                            | 2 (13.3%)           |
|                                 | Prior cardiac surgery                              | 2 (13.3%)           |
|                                 | Prior CABG                                         | 1 (6.7%)            |
|                                 | Prior PCI                                          | 1 (6.7%)            |
|                                 | Prior AMI                                          | 2 (13.3%)           |
|                                 | STS score (%)                                      | 4.0 ± 2.8           |
| Laboratory and TTE              | Creatinine clearance (mL/min/1.73 m <sup>2</sup> ) | 61.9 ± 20.6         |
|                                 | Haemoglobin (g/dL)                                 | 12.7 ± 1.8          |
|                                 | Ejection fraction (%)                              | 55.3 ± 9.6          |
|                                 | Mean aortic gradient (mmHg)                        | 45.2 ± 15.0         |
|                                 | AR ≥moderate                                       | 4 (26.7%)           |
| Aortic valve CT scan evaluation | Annulus min diameter (mm)                          | 20.5 ± 2.5          |
|                                 | Annulus max diameter (mm)                          | 25.1 ± 2.8          |
|                                 | Annulus mean diameter (mm)                         | 22.8 ± 2.6          |
|                                 | Annulus perimeter (mm)                             | 72.0 ± 8.0          |
|                                 | Annulus area (mm <sup>2</sup> )                    | 406.7 ± 87.6        |
|                                 | Sinus of Valsalva diameter (mm)                    | 31.4 ± 2.5          |
|                                 | Calcium volume 800 HU (mm <sup>3</sup> )           | 256.8 [100.0–382.9] |
|                                 | Aortic angulation (°)                              | 46.3 ± 9.6          |
|                                 | Index of eccentricity                              | 0.18 ± 0.06         |
|                                 | LVOT diameter (mm)                                 | 22.5 ± 3.3          |
| Ascending aorta (mm)            | 28.3 ± 3.6                                         |                     |
| CAA CT scan evaluation          | LM height (mm)                                     | 13.4 ± 2.9          |
|                                 | RCA height (mm)                                    | 18.5 ± 3.2          |
|                                 | Anomalous RCA                                      | 12 (80.0%)          |
|                                 | Anomalous LCx                                      | 1 (6.7%)            |
|                                 | Anomalous LM                                       | 2 (13.3%)           |
|                                 | Intramural course                                  | 4 (26.7%)           |
|                                 | Oval ostium                                        | 4 (26.7%)           |
|                                 | Slit-like ostium                                   | 2 (13.3%)           |
| Acute take-off                  | 8 (53.3%)                                          |                     |

Values expressed as mean±SD, median (25<sup>th</sup>–75<sup>th</sup> percentile) or N (%). AMI, acute myocardial infarction; AR, aortic regurgitation; CAA, coronary artery anomalies; CABG, coronary artery bypass grafting; COPD, chronic obstructive pulmonary disease; CT, computed tomography; HU, Hounsfield Units; LM, left main; LVOT, left ventricular outflow tract; PCI, percutaneous coronary intervention; RCA, right coronary artery; STS, Society of

Thoracic Surgeons; TTE transthoracic echocardiography.

384

385

386 **Table 2. Procedural and follow up data of patients with CAA who underwent TAVR.**

| Variables                                                                                                                                                                                                                                                                                              |                                  | Overall<br>(N=15)     |
|--------------------------------------------------------------------------------------------------------------------------------------------------------------------------------------------------------------------------------------------------------------------------------------------------------|----------------------------------|-----------------------|
| Procedure                                                                                                                                                                                                                                                                                              | Femoral route                    | 15 (100.0%)           |
|                                                                                                                                                                                                                                                                                                        | Subclavian route                 | 0 (0.0%)              |
|                                                                                                                                                                                                                                                                                                        | Embolic protection system        | 3 (20.0%)             |
|                                                                                                                                                                                                                                                                                                        | Any vascular complications       | 1 (6.7%)              |
|                                                                                                                                                                                                                                                                                                        | PTA with stenting of access site | 1 (6.7%)              |
|                                                                                                                                                                                                                                                                                                        | PCI with stenting                | 1 (6.7%)              |
|                                                                                                                                                                                                                                                                                                        | Predilatation                    | 10 (66.7%)            |
|                                                                                                                                                                                                                                                                                                        | Postdilatation                   | 3 (20.0%)             |
|                                                                                                                                                                                                                                                                                                        | Emergent cardiac surgery         | 0 (0.0%)              |
|                                                                                                                                                                                                                                                                                                        | Need for second valve            | 0 (0.0%)              |
|                                                                                                                                                                                                                                                                                                        | Contrast volume (mL)             | 173.8 ± 57.8          |
|                                                                                                                                                                                                                                                                                                        | Fluoroscopy time (min)           | 21.2 ± 9.8            |
|                                                                                                                                                                                                                                                                                                        | Outcomes                         | Ejection fraction (%) |
| Mean gradient (mmHg)                                                                                                                                                                                                                                                                                   |                                  | 8.2 ± 4.4             |
| PVL absent/trivial                                                                                                                                                                                                                                                                                     |                                  | 5 (33.3%)             |
| PVL mild                                                                                                                                                                                                                                                                                               |                                  | 10 (66.7%)            |
| PVL >moderate                                                                                                                                                                                                                                                                                          |                                  | 0 (0.0%)              |
| Technical success                                                                                                                                                                                                                                                                                      |                                  | 13 (86.7%)            |
| Device success (at 30 days)                                                                                                                                                                                                                                                                            |                                  | 12 (80.0%)            |
| PPI                                                                                                                                                                                                                                                                                                    |                                  | 1 (6.7%)              |
| Stroke (including not disabling)                                                                                                                                                                                                                                                                       |                                  | 0 (0.0%)              |
| 30-day mortality                                                                                                                                                                                                                                                                                       |                                  | 0 (0.0%)              |
| 1-year mortality                                                                                                                                                                                                                                                                                       |                                  | 1 (11.1%)             |
| <p>Values expressed as mean±SD, median (25<sup>th</sup>-75<sup>th</sup> percentile) or N (%). LCC, left coronary cusp; NCC, non-coronary cusp; PCI, percutaneous coronary intervention; PPI, permanent pacemaker implantation; PTA, percutaneous transluminal angioplasty; PVL, paravalvular leak.</p> |                                  |                       |

387

388

389 **Table 3. Data of CAA features and TAVR prosthesis choice.**

| Patient ID | Anomalous CA | Anomalous origin   | Course         | Intramural tract | TAVR prosthesis | Size |
|------------|--------------|--------------------|----------------|------------------|-----------------|------|
| 1          | LCx          | RSV                | Retro-aortic   | No               | Portico         | 25   |
| 2          | RCA          | LSV                | Inter-arterial | Yes              | Myval           | 26   |
| 3          | RCA          | LSV                | Inter-arterial | No               | Acurate Neo     | M    |
| 4          | RCA          | LSV                | Inter-arterial | No               | Evolut-R        | 26   |
| 5          | RCA          | LSV                | Inter-arterial | No               | Acurate Neo     | S    |
| 6          | RCA          | Above STJ          | Inter-arterial | No               | Acurate Neo     | S    |
| 7          | RCA          | RCC-LCC commissure | Inter-arterial | No               | Evolut-R        | 26   |
| 8          | LM           | NCC-LCC commissure | Retro-aortic   | No               | Myval           | 27,5 |
| 9          | RCA          | Above STJ          | Inter-arterial | No               | Evolut-R        | 26   |
| 10         | RCA          | LSV                | Inter-arterial | Yes              | Myval           | 23   |
| 11         | RCA          | RCC-NCC commissure | Inter-arterial | No               | Evolut-PRO      | 29   |
| 12         | RCA          | LSV                | Inter-arterial | Yes              | Navitor         | 29   |
| 13         | RCA          | LSV                | Inter-arterial | Yes              | Evolut-R        | 34   |
| 14         | LM           | RSV                | Retro-aortic   | No               | Portico         | 23   |
| 15         | RCA          | RCC-LCC commissure | Inter-arterial | No               | Portico         | 25   |

CAA, coronary artery anomalies; LCC, left coronary cusp; LCx, left circumflex artery; LM, left main LSV, left sinus of Valsalva; NCC, non-coronary cusp; RCA, right coronary artery; RCC, right coronary cusp; RSV, right sinus of Valsalva; STJ, sino-tubular junction

390

391 **Figure Titles and Legends**

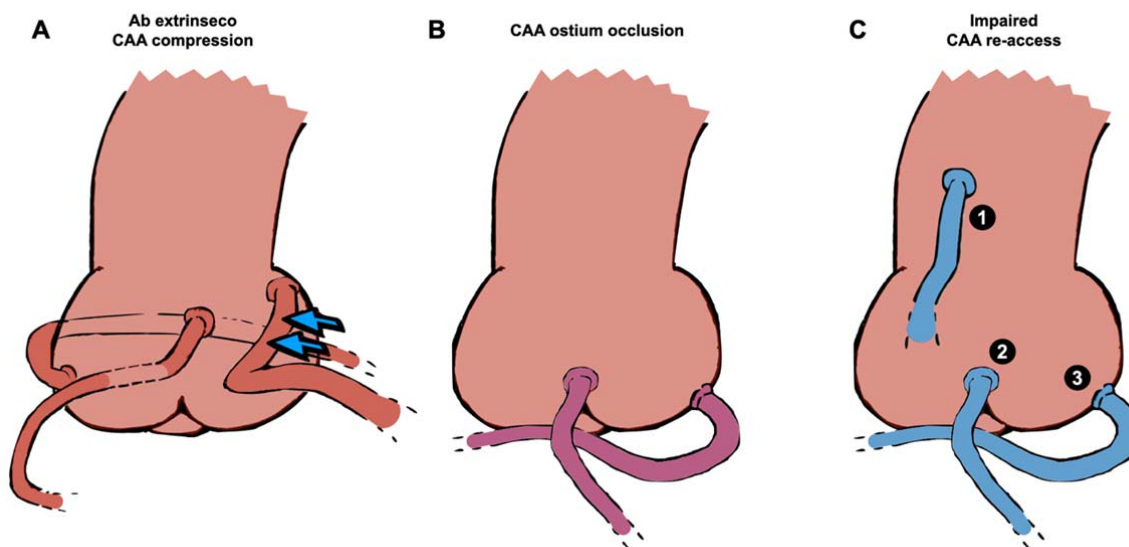

392

393 **Central Illustration. Most common phenotypes of CAA in patients undergoing TAVR,**

394 **classified by mechanism of impairment. (A) Compression ab extrinseco (red). From left to right:**

395 retroaortic course, intramural course and interarterial course (blue arrows to represent pulmonary

396 artery compression). (B) Ostium occlusion (purple). From left to right: commissural origin and low

397 origin from opposite SV. (C) Challenging re-access (blue). 1) above STJ origin; 2) commissural

398 origin and 3) low origin from opposite SV.

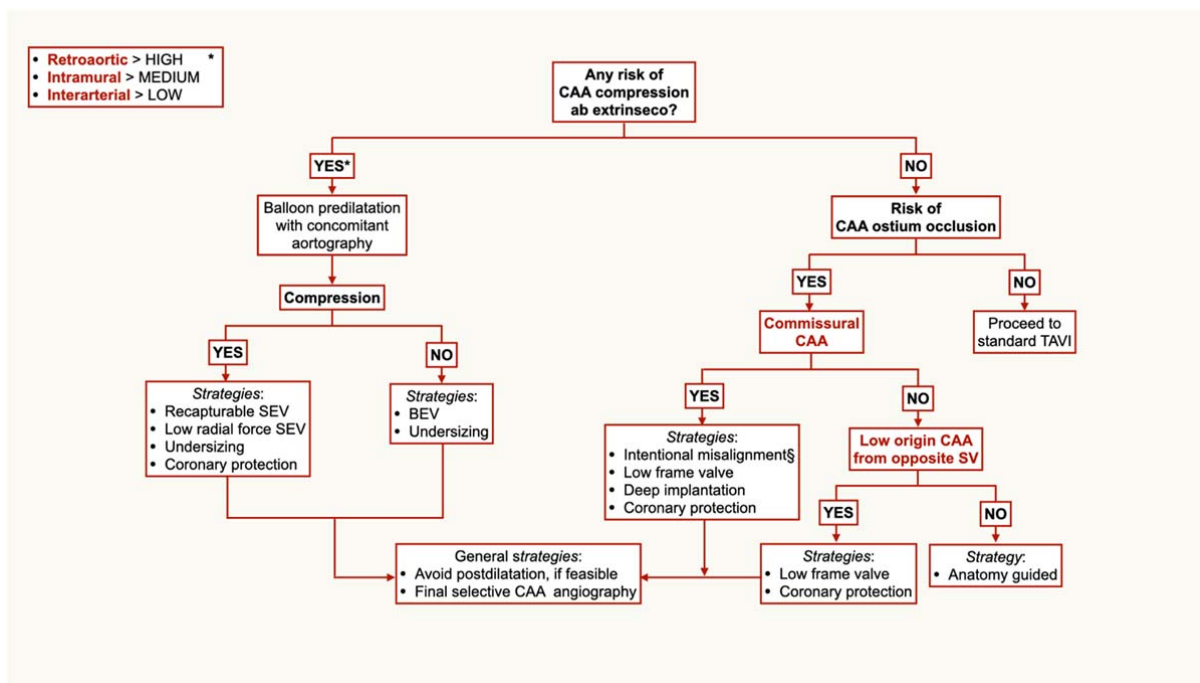

399

400 **Figure 1. Algorithm for valve choice in patient with CAA undergoing TAVR, at risk of**  
 401 **coronary occlusion.** \*Retroaortic, intramural and interarterial CAA have different risk of coronary  
 402 compression and subsequent occlusion, but the anatomy must be assessed case-by-case. However,  
 403 the algorithm is not affected, due to data paucity and unpredictable behavior in real world. §Placing  
 404 of a neocommissure in front of the CAA ostium, through a custom projection, detected by CT scan.  
 405 BEV, balloon-expandable valve; CAA, coronary artery anomaly; SEV, self-expandable valve; SV,  
 406 sinus of Valsalva.

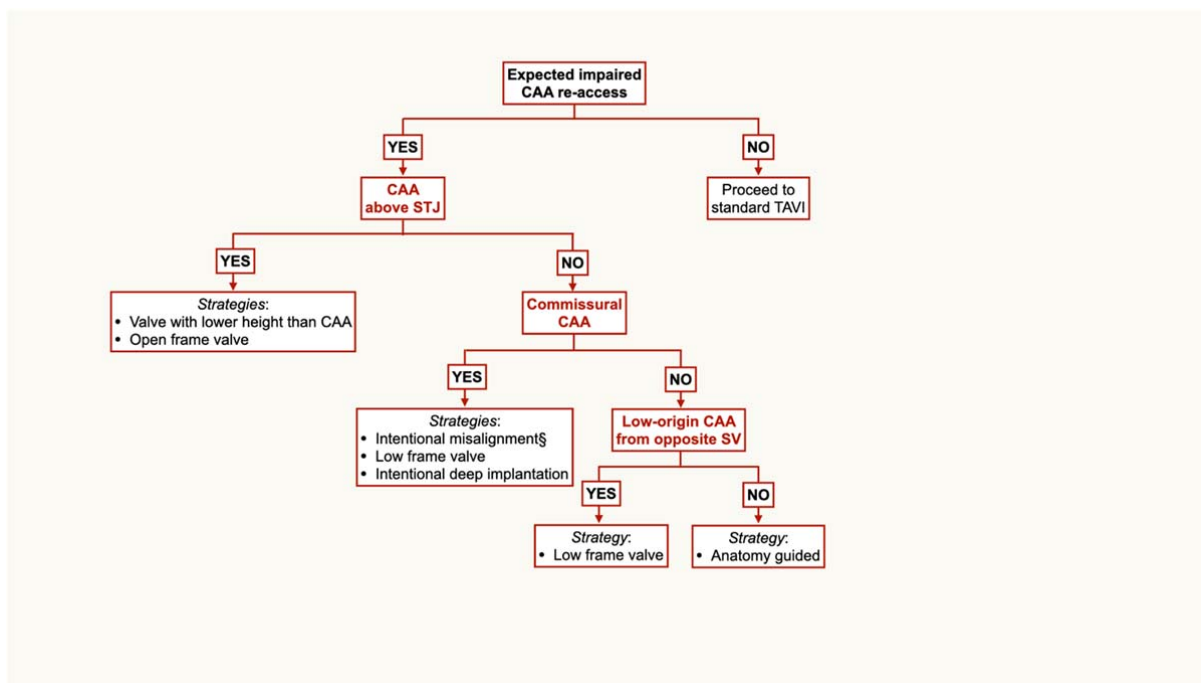

407

408 **Figure 2. Algorithm for valve choice in patient with CAA who undergo TAVR, at risk of**

409 **impaired coronary re-access.** §Placing of a neocommissure in front of the CAA ostium, through a

410 custom projection, detected by CT scan.

411 CAA, coronary artery anomaly; STJ, sino-tubular junction; SV, sinus of Valsalva.
